# Supplementary material
Source: PubMed Central journal article supplement (PMC7014971)

**Figure 4a**

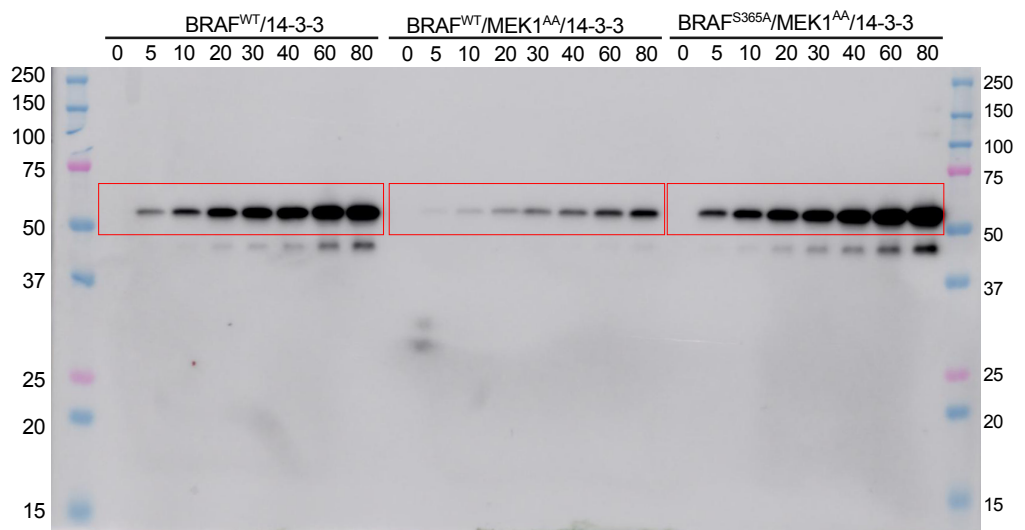

Anti phosphoMEK1/2 (pS218/222)

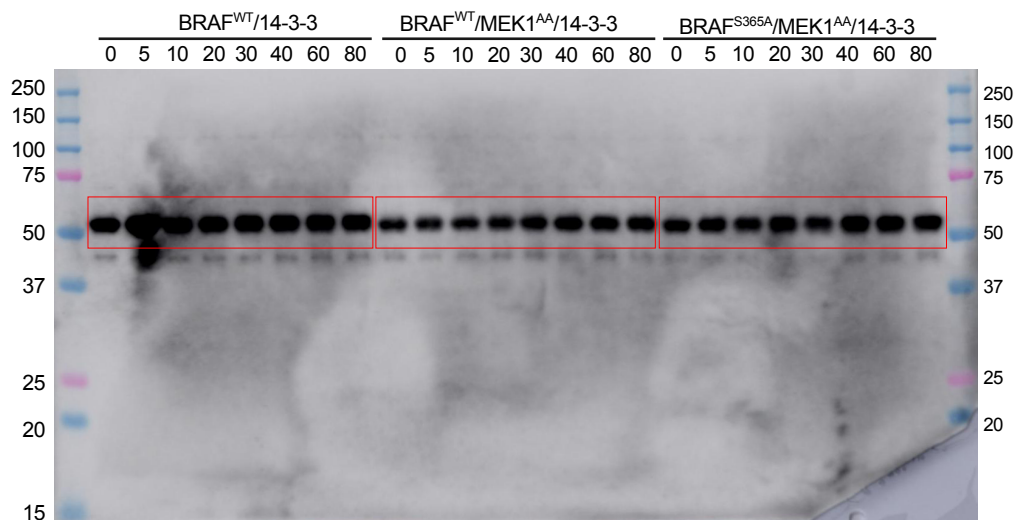

Anti MEK1/2

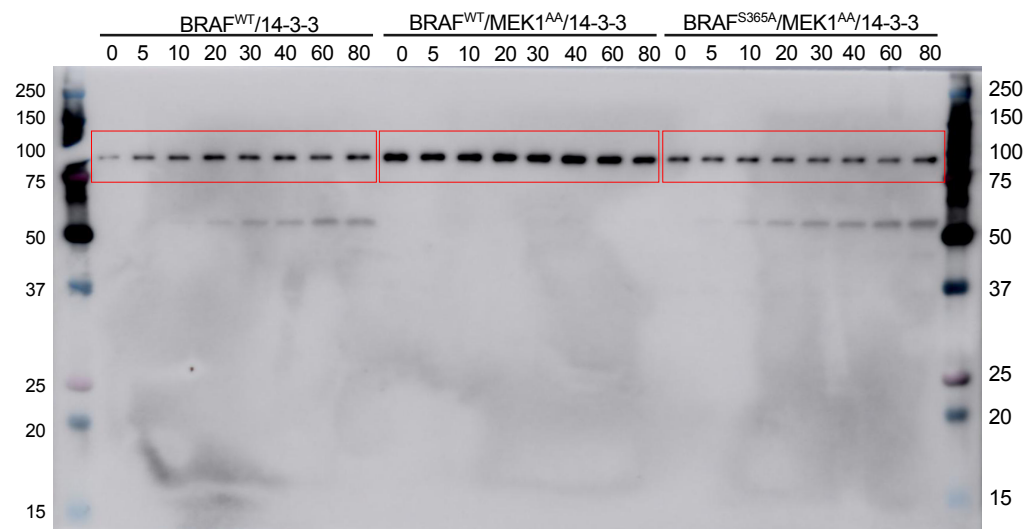

Anti StrepII (BRAF)

## Extended Data Figure 1b

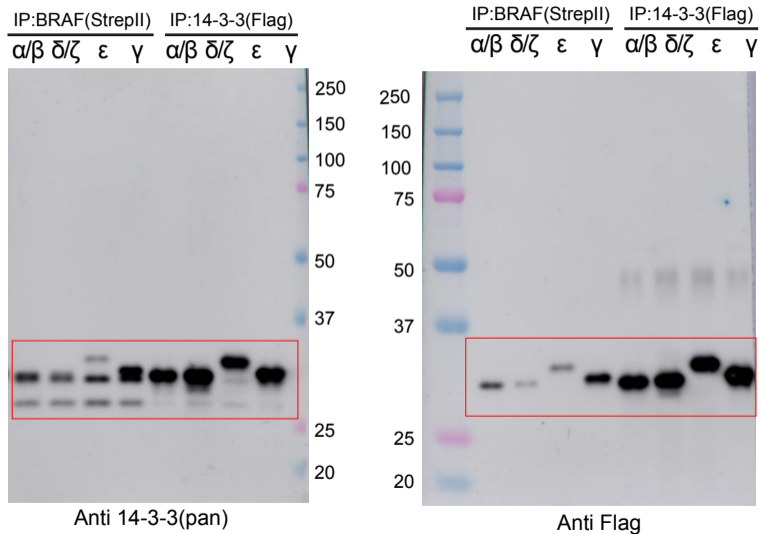

## Extended Data Figure 7a

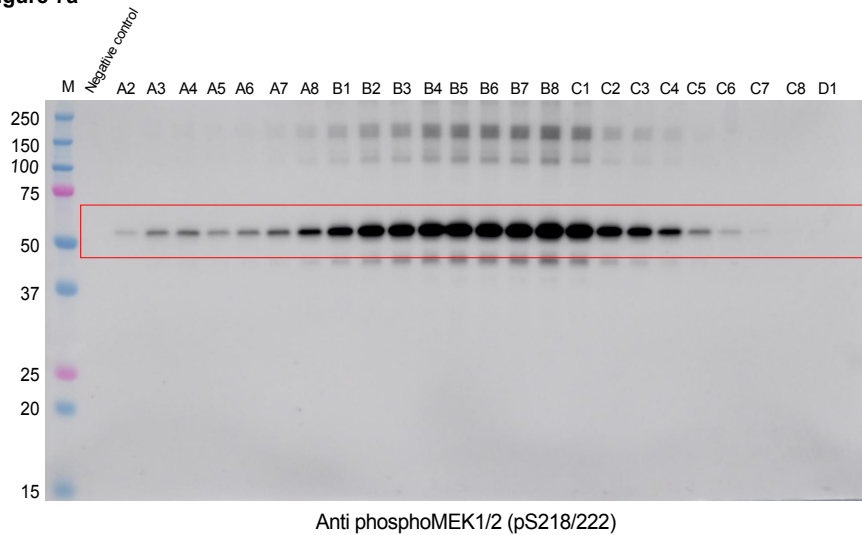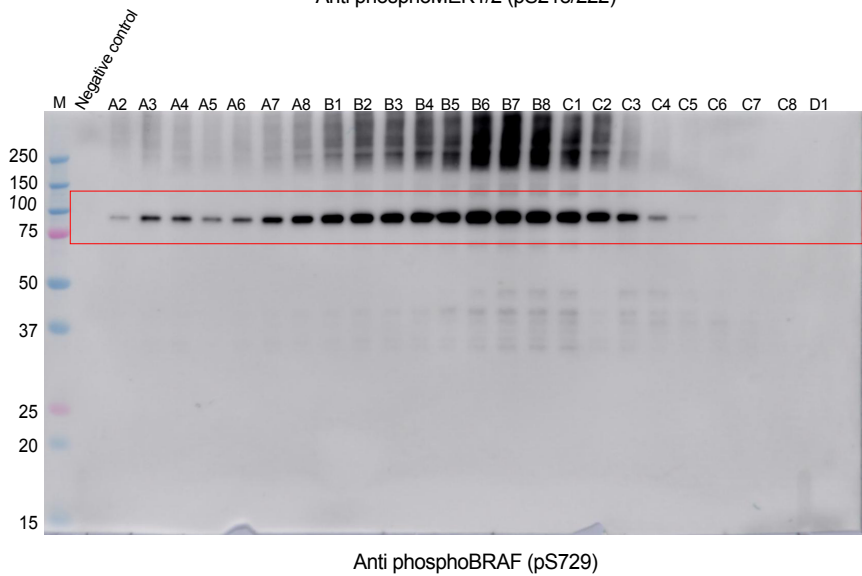

### Extended Data Figure 7b

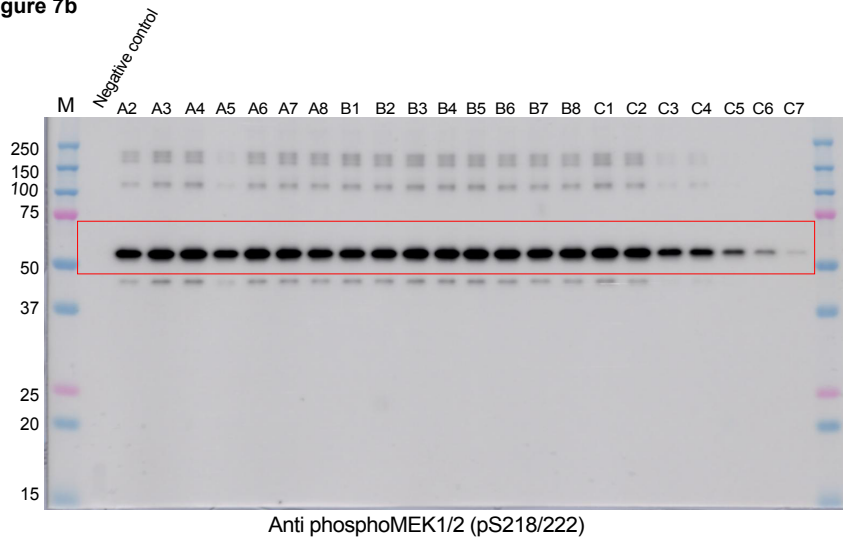

### Extended Data Figure 7c

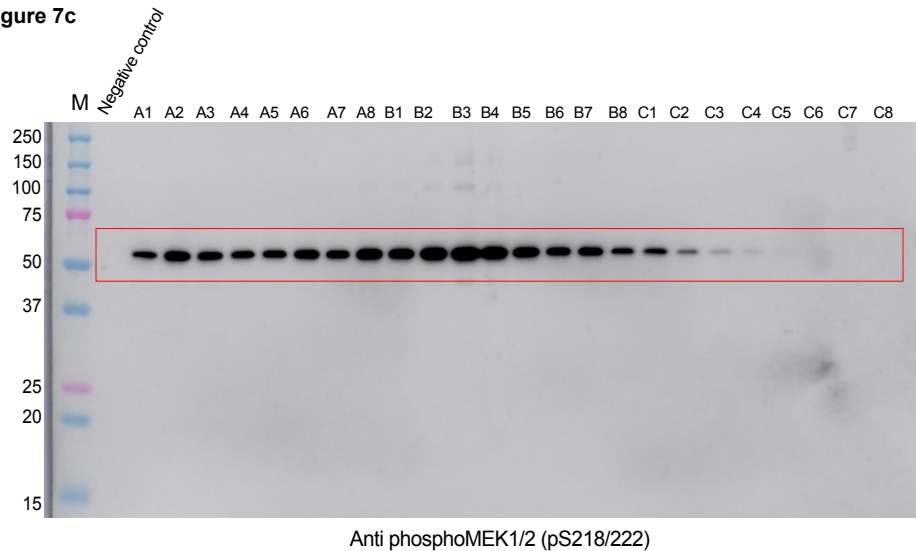

## Extended Data Figure 7e

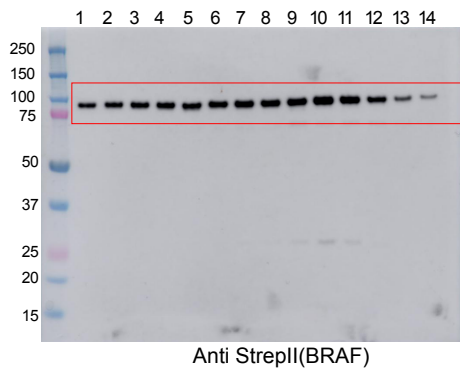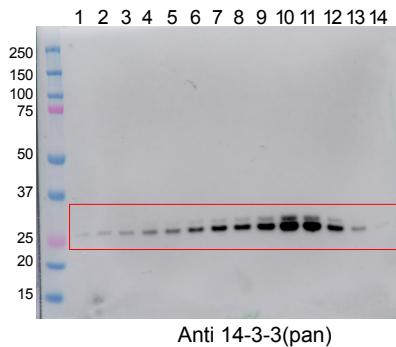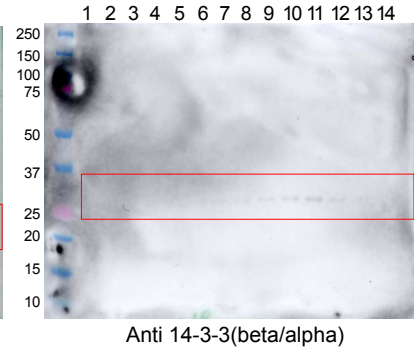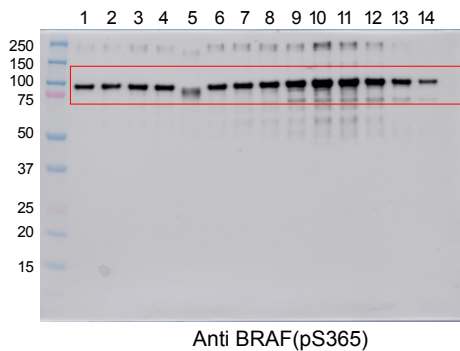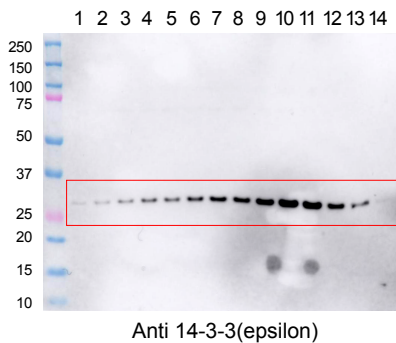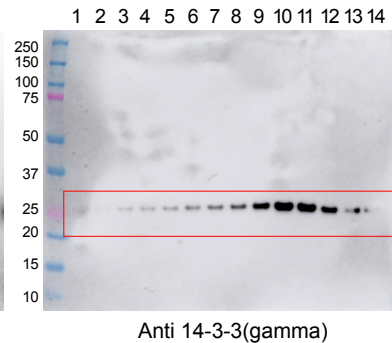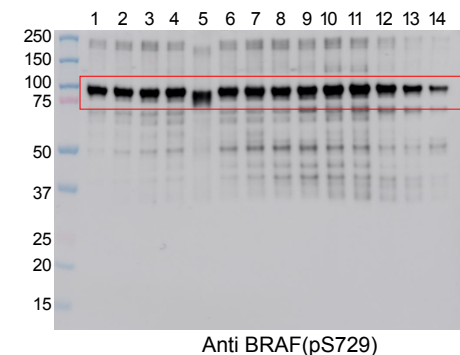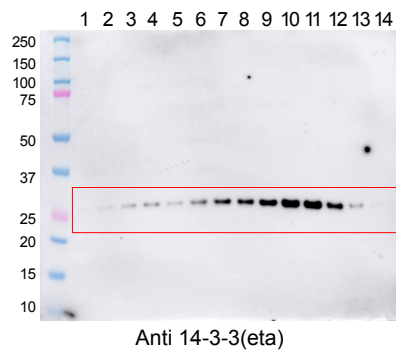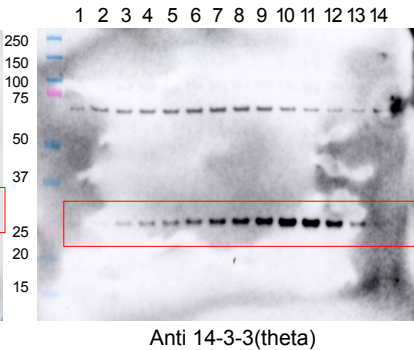

Supplement: NIHMS1540805-supplement-1.pdf [file NIHMS1540805-supplement-1.pdf]
